# Supplementary material for: Effect of taking aspirin before diagnosis on the prognosis of esophageal squamous cell carcinoma and analysis of prognostic factors
Source: PubMed Central journal article supplement — J Int Med Res. 2022 Apr 11;50(4):03000605221089799. doi: 10.1177/03000605221089799 (PMC9006383; doi:10.1177/03000605221089799), 2022-04-11
Supplement: sj-pdf-1-imr-10.1177_03000605221089799.pdf [file sj-pdf-1-imr-10.1177_03000605221089799.pdf]

## Supporting Information

COX-2 mouse monoclonal antibody is from Hangzhou Huaan Biotechnology Co., Ltd., Cat#: RT1159. When using, the ratio of concentration is 1:100.

We believe that this study does not require ethical review. The reason is that this group of patients has been taking aspirin for a long time due to cardiovascular and cerebrovascular diseases, rather than requiring patients to take medication in the experiment. Second, the specimens used in the study were all patients taking aspirin. The tumor tissue that is surgically removed is not the normal tissue that is deliberately removed. Finally, the patient's follow-up was approved by the patient.
